# Supplementary material
Source: PubMed Central journal article supplement (PMC6865264)
Supplement: jamapsychiatry-77-139-s003.pdf [file jamapsychiatry-77-139-s003.pdf]

Wilfley. Training models for implementing evidence-based psychological treatment: a cluster randomized trial in college mental health. *JAMA Psychiatry*. Published online November 6, 2019. doi:10.1001/jamapsychiatry.2019.3483

## Data Sharing Statement

### Data

**Data available:** Yes

**Data types:** Deidentified participant data

**How to access data:** Data sharing statement: Data available: Yes

Data types: Deidentified participant data that underlie the results reported in this article (texts, tables, figures, appendices). How to access data: Request from contact author ([wilfleyd@wustl.edu](mailto:wilfleyd@wustl.edu)) When available: Beginning 12 months following article publication; no end date. Supporting Documents Study protocol, statistical analysis plan.

**When available:** beginning date: 09-01-2020

### Supporting Documents

**Document types:** None

### Additional Information

**Who can access the data:** Researchers whose proposed use of the data has been approved by the PIs of the project.

**Types of analyses:** If requests are within the scope of the research team to support so that appropriate analyses can be conducted, a data sharing agreement will be established between the institutions (and investigators) requesting and holding the research data.

**Mechanisms of data availability:** Proposals and request for data should be directed to the contact author. A data sharing agreement will also be established.
